# Supplementary material
Source: publisher figshare collection journal article supplement (https://gsapubs.figshare.com/articles/dataset/_/14568990)
Supplement: Supplementary file 1 [file 1]

Adlakha, E., and Hattori, K., 2021, Thermotectonic events recorded by U-Pb geochronology and Zr-in-rutile thermometry of Ti oxides in basement rocks along the P2 fault, eastern Athabasca Basin, Saskatchewan, Canada: GSA Bulletin, <https://doi.org/10.1130/B35820.1>.

## Supplemental Material

### **SUPPLEMENTAL FILE 1**

**Figure A1.** Local geological map and cross-sections showing sample locations. (A) A plan view map showing the intersection of the P2 fault and associated faults at the unconformity of the Athabasca Basin. The major rock-types are shown in addition to the location of ore zones along the P2 fault. The location of the cross-sections in panels b to e are also shown (e.g., CS-B). The location of samples not shown in the following cross-sections are also indicated. Modified from Adlakha et al. (2020). (B–E) Schematic cross-sections of the P2 fault showing the sample locations in drill-core (stars). Cross-sections are simplified and were provided by Cameco. A small map showing the location of (A) and the Athabasca Basin, in addition to the Kivalliq Igneous Suite and the Thelon Basin, in Canada, is shown in the bottom left have corner.

**Figure A2.** Modelling results for the cooling age profiles of rutile in this study using the program DiffArg. The three piecewise linear models are for rutile with a radius of A) 250  $\mu\text{m}$ , B) 160  $\mu\text{m}$  and C) 50  $\mu\text{m}$ .

**Figure A3.** (A) A biplot showing the Concordia Age (Ma) vs Weighted Mean  $^{207}\text{Pb}/^{206}\text{Pb}$  age of rutile and anatase per sample. The ages and number of analyses are listed in Table 1. (B) A biplot showing the normalized spot location and  $^{207}\text{Pb}/^{206}\text{Pb}$  age for five rutile samples. Trendlines are shown for each population of rutile, and the low R-squared value is shown for the trendline of MAC99.

**Figure A4.** Box and Whisker plot showing the variation in calculated Zr-in-rutile temperatures per sample (listed in order below the graph). Circle markers represent individual analyses. The y-axis is scaled for 650 to 1000  $^{\circ}\text{C}$  to show the majority of the data and results of statistical calculations; however, there are a few outliers outside of this range. Outliers account for samples with a large difference between the mean (indicated by x) and median (see Supplemental File 2 for complete dataset including outliers).

**TABLE A1.** SAMPLE LIST AND DESCRIPTIONS, MODIFIED FROM ADLAKHA ET AL. (2020).

**TABLE A2.** RUNNING CONDITIONS OF THE LA-ICP-MS FOLLOWING HORSTWOOD ET AL. (2016).

### **SUPPLEMENTAL FILE 2**

Excel file containing U-Pb dataset for rutile and anatase, as well as Concordia diagrams and  $^{207}\text{Pb}/^{206}\text{Pb}$  weighted mean diagrams for each sample.

## APPENDIX

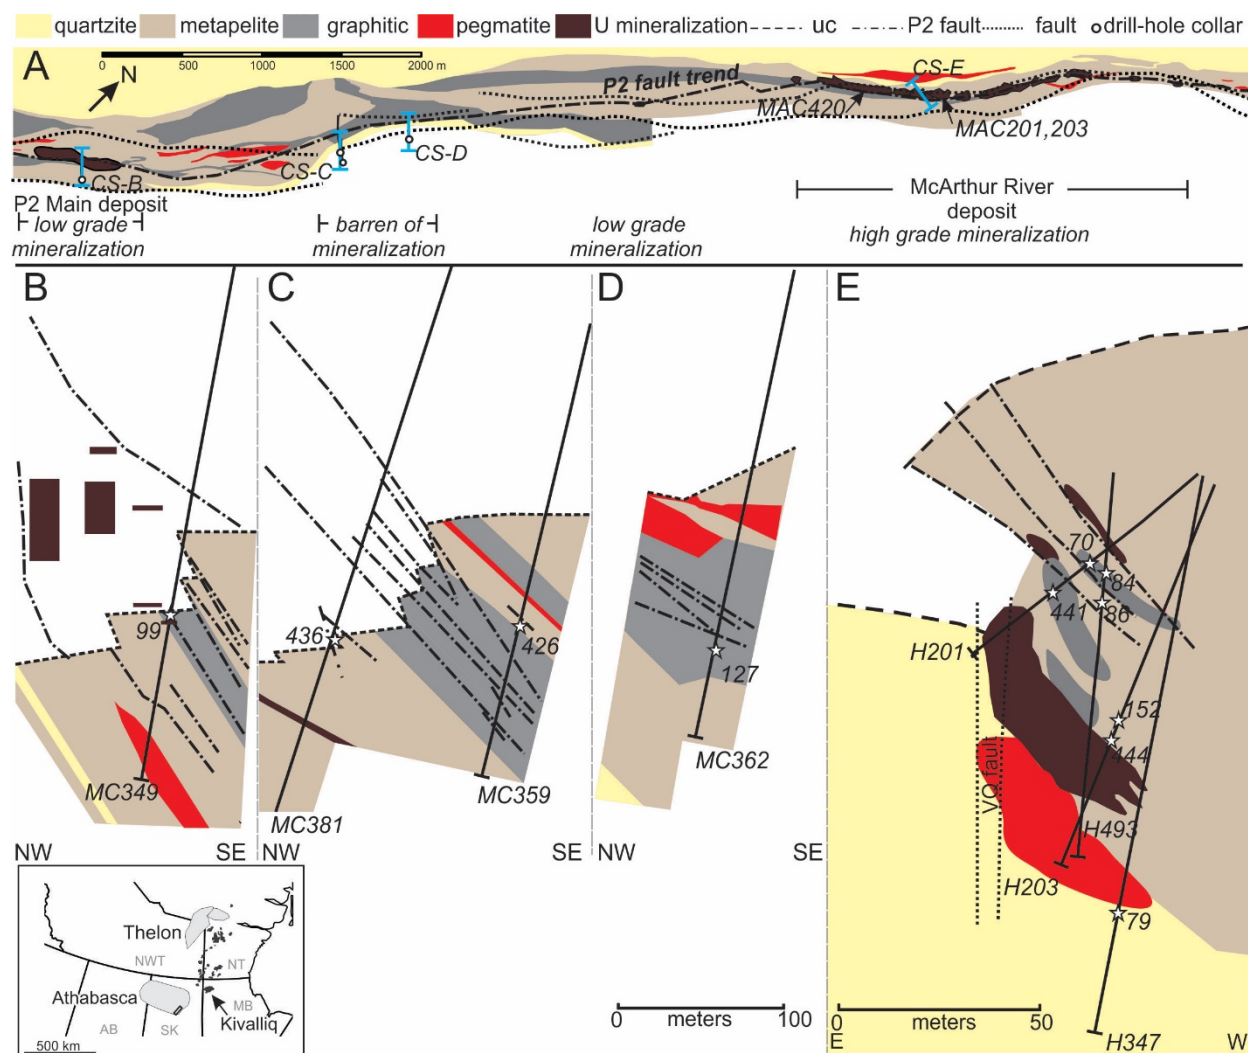

Figure A1: Local geological map and cross-sections showing sample locations. A) A plan view map showing the intersection of the P2 fault and associated faults at the unconformity of the Athabasca Basin. The major rock-types are shown in addition to the location of ore zones along the P2 fault. The location of the cross-sections in panels b to e are also shown (e.g., CS-B). The location of samples not shown in the following cross-sections are also indicated. Modified from Adlakha et al. (2020). B-E) Schematic cross-sections of the P2 fault showing the sample locations in drill-core (stars). Cross-sections are simplified and were provided by Cameco. A small map showing the location of (A) and the Athabasca Basin, in addition to the Kivalliq Igneous Suite and the Thelon Basin, in Canada, is shown in the bottom left have corner.

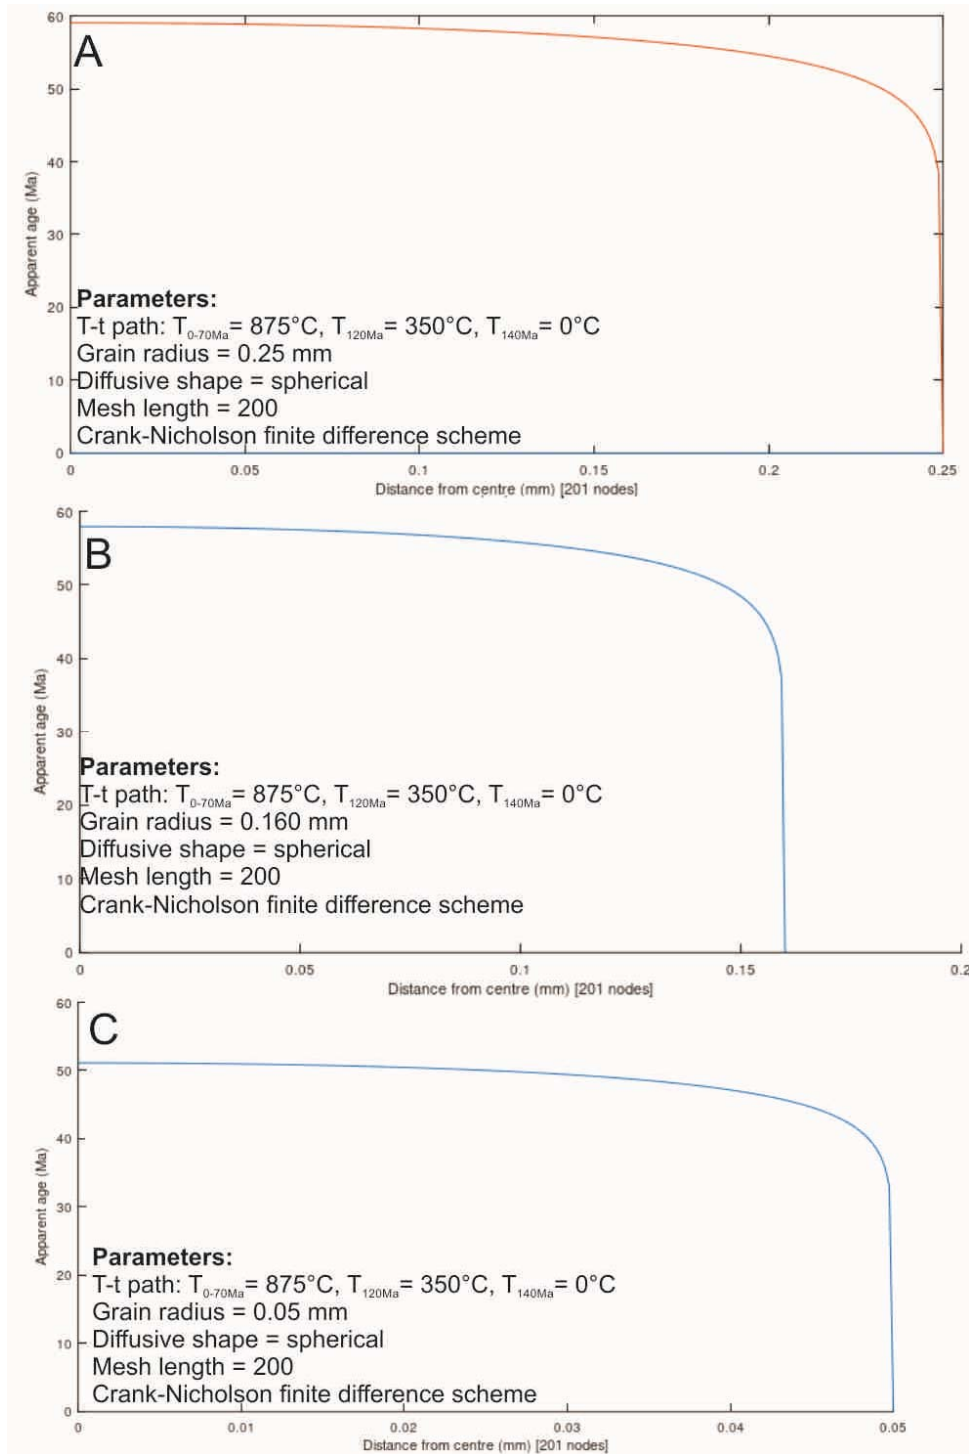

Figure A2: Modelling results for the cooling age profiles of rutile in this study using the program DiffArg. The three piecewise linear models are for rutile with a radius of A) 250  $\mu\text{m}$ , B) 160  $\mu\text{m}$  and C) 50  $\mu\text{m}$ .

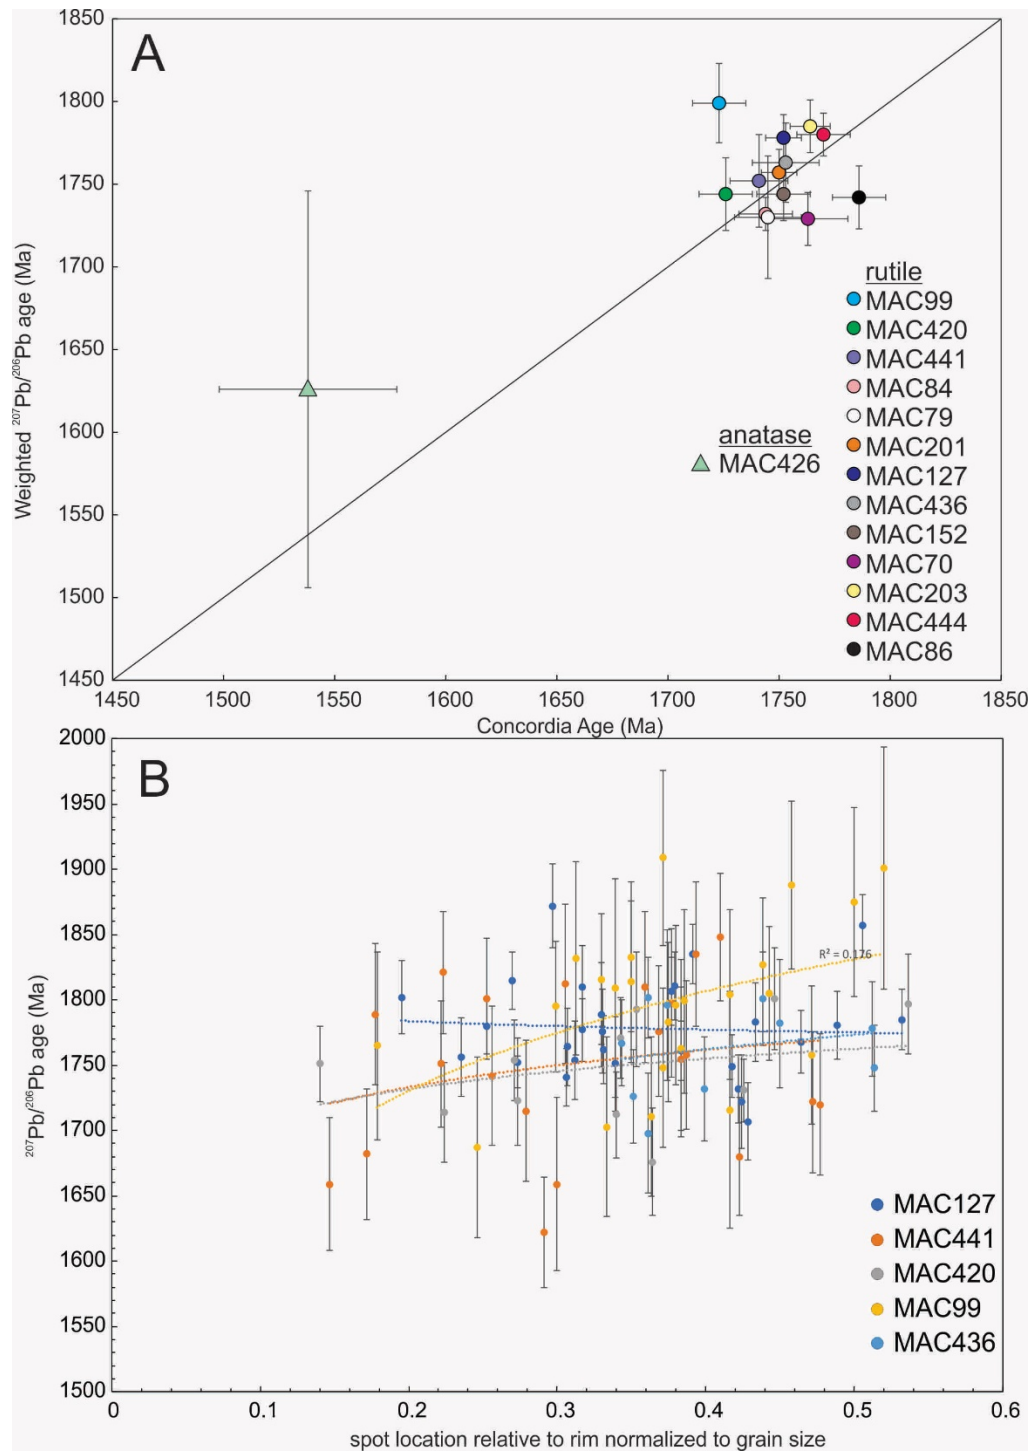

Figure A3: A) A biplot showing the Concordia Age (Ma) vs Weighted Mean  $^{207}\text{Pb}/^{206}\text{Pb}$  age of rutile and anatase per sample. The ages and number of analyses are listed in Table 1. B) A biplot showing the normalized spot location and  $^{207}\text{Pb}/^{206}\text{Pb}$  age for five rutile samples. Trendlines are shown for each population of rutile, and the low R-squared value is shown for the trendline of MAC99.

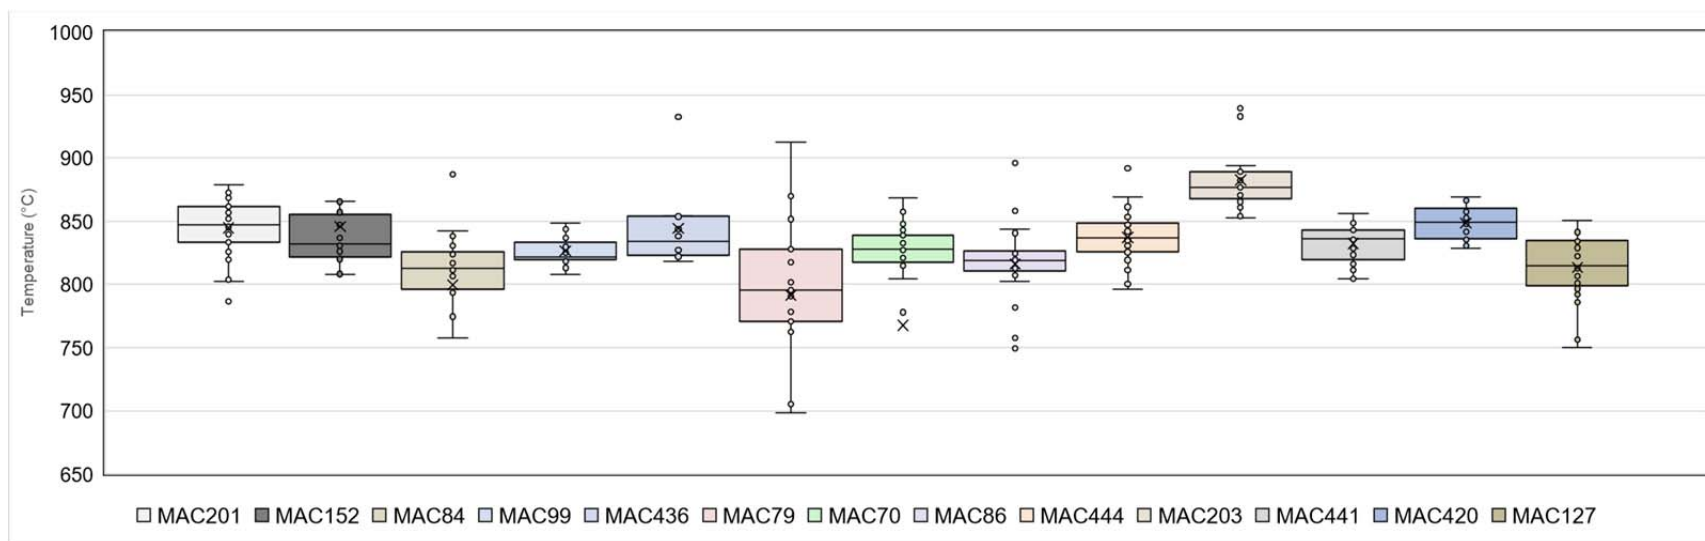

Figure A4: Box and Whisker plot showing the variation in calculated Zr-in-rutile temperatures per sample (listed in order below the graph). Circle markers represent individual analyses. The y-axis is scaled for 650 to 1000 °C to show the majority of the data and results of statistical calculations; however, there are a few outliers outside of this range. Outliers account for samples with a large difference between the mean (indicated by x) and median (see Supplemental File 2 for complete dataset including outliers).

TABLE A1: SAMPLE LIST AND DESCRIPTIONS, MODIFIED FROM ADLAKHA ET AL. (2020)

| DDH <sup>a</sup> | Easting <sup>b</sup> | Northing <sup>b</sup> | Sample | Depth (m) | Lithology                                                                                | Ti oxide mineral assemblage <sup>c</sup> | Ti oxide size (µm) | Ti oxide texture                                 |
|------------------|----------------------|-----------------------|--------|-----------|------------------------------------------------------------------------------------------|------------------------------------------|--------------------|--------------------------------------------------|
| MC349            | 493360               | 6397987               | MAC99  | 573       | quartz+oxy-dravite graphitic metapelite breccia with intense magnesio-foitite alteration | Rt-Qz-Dv-Ms-Zr                           | 50 - 150           | Subhedral, fractured crystals                    |
| H3559            | 496738               | 640096                | MAC201 | 20.5      | quartz+oxy-dravite vein in graphitic metapelite                                          | Rt-Qz-Gr-Dv-Ms-Zr                        | 50 - 500           | Subhedral to rounded, clean to corroded rims     |
| H3576            | 496912.3<br>0        | 6402209.<br>09        | MAC203 | 55.7      | metapelite with leucosome                                                                | Rt-Qz-Zr                                 | 200 - 400          | Subhedral, heavily fractured with corroded rims  |
| H203             | 496706.6<br>8        | 6402036.<br>94        | MAC152 | 62        | graphitic metapelite                                                                     | Rt-Qz-Zr                                 | 100 - 400          | Subhedral, fractured with corroded rims          |
| H203             | 496706.6<br>8        | 6402036.<br>94        | MAC444 | 69.7      | graphitic metapelite with 1 cm wide leucosome                                            | Rt-Qz-Gr-Ms-Zr                           | 50 - 300           | Subhedral, fractured with corroded rims          |
| H201             | 496726               | 6402059               | MAC70  | 34.3      | graphitic metapelite breccia                                                             | Rt-Qz-Gr-Ms-Zr                           | 20 - 100           | Subhedral, fractured with corroded rims          |
| H201             | 496726               | 6402059               | MAC441 | 46.5      | graphitic metapelite with leucosome patches                                              | Rt-Qz-Gr-Ms-Zr                           | 50 - 200           | Subhedral, fractured with corroded rims          |
| H347             | 496725.5<br>5        | 6402060.<br>37        | MAC79  | 106       | yellow-clay altered quartzite breccia                                                    | Rt-Qz-Sil-Ms-Zr                          | 50 - 500           | Sub-anhedral, fractured                          |
| H493             | 496715.8<br>4        | 6402080.<br>27        | MAC84  | 24.5      | quartz+oxy-dravite graphitic metapelite breccia                                          | Rt-Qz-Gr-Dv-Zr-Py                        | 50 - 200           | Subhedral, fractured with corroded rims          |
| H493             | 496715.8<br>4        | 6402080.<br>27        | MAC86  | 31.7      | graphitic metapelite breccia with leucosomes                                             | Rt-Qz-Gr-Ms                              | 50 - 150           | Subhedral, fractured with corroded rims          |
| H677             | 496483.0<br>3        | 6401838.<br>18        | MAC420 | 57.1      | metapelite with 10 cm wide pegmatite                                                     | Rt-Qz-Gr-Zr                              | 50 - 400           | Subhedral, fractured with corroded rims          |
| MC362            | 494625.3<br>1        | 6399624.<br>84        | MAC127 | 602.3     | graphitic metapelite breccia with leucosomes                                             | Rt-Qz-Gr-Dv-Zr-Py                        | 40 - 250           | Subhedral, fractured crystals                    |
| MC381            | 494386.1<br>3        | 6399253.<br>88        | MAC436 | 603       | quartz+oxy-dravite graphitic metapelite breccia with intense magnesio-foitite alteration | Rt-Qz-Dv-Zr                              | 20 - 100           | Euhedral, equant crystals with corroded rims     |
| MC359            | 494441.9<br>1        | 6399221.<br>16        | MAC426 | 581.6     | local hematite-dolomite in graphitic metapelite                                          | Ant-Dol-Hem                              | < 100              | Euhedral to anhedral crystals with corroded rims |

a: diamond drill hole.

b: UTM Zone 13, WGS-84, coordinates of DDH collar

c: Ant = anatase, Dol = dolomite, Dv = oxy-dravite, Gr = graphite. Hem = hematite, Ms = muscovite, P = pyrite, Qz = quartz, Rt = rutile, Sil = sillimanite, Zr = zircon

TABLE A2: RUNNING CONDITIONS OF THE LA-ICP-MS FOLLOWING HORSTWOOD ET AL. (2016)

| Feature                                                                                                  | Description                                                                                                                                                                                                                            |
|----------------------------------------------------------------------------------------------------------|----------------------------------------------------------------------------------------------------------------------------------------------------------------------------------------------------------------------------------------|
| <u>Laboratory &amp; Sample Preparation</u>                                                               |                                                                                                                                                                                                                                        |
| Laboratory name                                                                                          | Dept of Earth Science, University of New Brunswick                                                                                                                                                                                     |
| Sample type/mineral                                                                                      | Rutile and anatase                                                                                                                                                                                                                     |
| Sample preparation                                                                                       | 100 $\mu\text{m}$ polished thick section, surface cleaned with methonal                                                                                                                                                                |
| Imaging                                                                                                  | Petrographic microscope; BSE TESCAN MIRA 3 LMU Variable Pressure<br>Schottky Field Emission SEM, 20 kV, 17mm working distance                                                                                                          |
| <u>Laser ablation system</u>                                                                             |                                                                                                                                                                                                                                        |
| Make, Model & type                                                                                       | COMPexPro                                                                                                                                                                                                                              |
| Laser wavelength (nm)                                                                                    | 193 nm                                                                                                                                                                                                                                 |
| Fluence ( $\text{J}\cdot\text{cm}^{-2}$ )                                                                | $2.9 \text{ J}\cdot\text{cm}^{-3}$                                                                                                                                                                                                     |
| Repetition rate (Hz)                                                                                     | 3 Hz                                                                                                                                                                                                                                   |
| Ablation duration (secs)                                                                                 | 30 secs                                                                                                                                                                                                                                |
| Ablation pit depth                                                                                       | 7.2 $\mu\text{m}$                                                                                                                                                                                                                      |
| Spot diameter ( $\mu\text{m}$ )                                                                          | 36 $\mu\text{m}$ / 50 $\mu\text{m}$ measured using an optical microscope                                                                                                                                                               |
| Sampling mode / pattern                                                                                  | Static spot ablation                                                                                                                                                                                                                   |
| Carrier gas                                                                                              | He in the cell, $\text{N}_2$ sampling-gas                                                                                                                                                                                              |
| Cell carrier gas flow (l/min)                                                                            | He (300 ml/min), $\text{N}_2$ (2 ml/min)                                                                                                                                                                                               |
| <u>ICP-MS Instrument</u>                                                                                 |                                                                                                                                                                                                                                        |
| Make, Model & type                                                                                       | Agilent 7700                                                                                                                                                                                                                           |
| Sample introduction                                                                                      | Ablation aerosol                                                                                                                                                                                                                       |
| RF power (W)                                                                                             | 1550W                                                                                                                                                                                                                                  |
| Masses measured & Integration time per peak/dwell times (s); quadrupole settling time between mass jumps | $^{47}\text{Ti}$ (0.01), $^{90}\text{Zr}$ (0.01), $^{202}\text{Hg}$ (0.04), $^{204}\text{Pb}$ (0.06), $^{206}\text{Pb}$ (0.04), $^{207}\text{Pb}$ (0.06), $^{208}\text{Pb}$ (0.01), $^{232}\text{Th}$ (0.01), $^{238}\text{U}$ (0.015) |
| <u>Data Processing</u>                                                                                   |                                                                                                                                                                                                                                        |
| Gas blank                                                                                                | 30 second on-peak zero subtracted                                                                                                                                                                                                      |
| Calibration strategy                                                                                     | NIST610 used as primary reference material for concentrations and R10 as primary reference material for rutile geochron. R13 used as a QC standard                                                                                     |
| Reference Material info                                                                                  | NIST610<br>R10 (Luvizotto et al., 2009)<br>R13 (Schmitt and Zack, 2012)                                                                                                                                                                |
| Data processing package used / Correction for LIEF                                                       | Iolite add-on (Version 2.5). for Igor Pro (Version 6.3.7, Wavemetrics Inc.) for data normalization, uncertainty propagation and age calculation.                                                                                       |
| Quality control / Validation                                                                             | R13 Concordia ages of $497.3 \pm 7.3$ (n = 10), $499.6 \pm 6.9$ (n = 10), and $498.2 \pm 8.2$ Ma (n = 8) for three sessions, within uncertainty of the published value ( $505 \pm 6$ Ma; Schmidt and Zack 2012)                        |
